# Supplementary material
Source: PubMed Central journal article supplement (PMC6944130)
Supplement: supp_7.4.E640_2019-0092-original-submission.pdf [file supp_7.4.E640_2019-0092-original-submission.pdf]

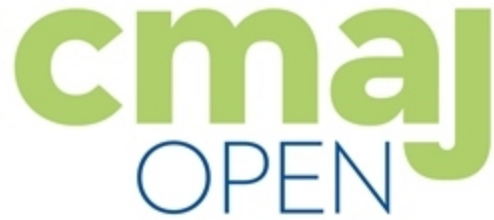

**Parent information needs and preferences related to  
pediatric bronchiolitis: a qualitative study**

|                               |                                                                                                                                                                                                                                                                                                                                                                                                                                                                                                                                                                                                                                                                                                                                                                                                                                                                                                                                                                                                                                                                                                                                                                                                                                                                                                                                                                                                                                                                                                                                                                                                                                                                                                                                                                                                                                                                                                |
|-------------------------------|------------------------------------------------------------------------------------------------------------------------------------------------------------------------------------------------------------------------------------------------------------------------------------------------------------------------------------------------------------------------------------------------------------------------------------------------------------------------------------------------------------------------------------------------------------------------------------------------------------------------------------------------------------------------------------------------------------------------------------------------------------------------------------------------------------------------------------------------------------------------------------------------------------------------------------------------------------------------------------------------------------------------------------------------------------------------------------------------------------------------------------------------------------------------------------------------------------------------------------------------------------------------------------------------------------------------------------------------------------------------------------------------------------------------------------------------------------------------------------------------------------------------------------------------------------------------------------------------------------------------------------------------------------------------------------------------------------------------------------------------------------------------------------------------------------------------------------------------------------------------------------------------|
| Journal:                      | <i>CMAJ Open</i>                                                                                                                                                                                                                                                                                                                                                                                                                                                                                                                                                                                                                                                                                                                                                                                                                                                                                                                                                                                                                                                                                                                                                                                                                                                                                                                                                                                                                                                                                                                                                                                                                                                                                                                                                                                                                                                                               |
| Manuscript ID                 | CMAJOpen-2019-0092                                                                                                                                                                                                                                                                                                                                                                                                                                                                                                                                                                                                                                                                                                                                                                                                                                                                                                                                                                                                                                                                                                                                                                                                                                                                                                                                                                                                                                                                                                                                                                                                                                                                                                                                                                                                                                                                             |
| Manuscript Type:              | Qualitative                                                                                                                                                                                                                                                                                                                                                                                                                                                                                                                                                                                                                                                                                                                                                                                                                                                                                                                                                                                                                                                                                                                                                                                                                                                                                                                                                                                                                                                                                                                                                                                                                                                                                                                                                                                                                                                                                    |
| Date Submitted by the Author: | 11-Jun-2019                                                                                                                                                                                                                                                                                                                                                                                                                                                                                                                                                                                                                                                                                                                                                                                                                                                                                                                                                                                                                                                                                                                                                                                                                                                                                                                                                                                                                                                                                                                                                                                                                                                                                                                                                                                                                                                                                    |
| Complete List of Authors:     | Campbell, Alyson; University of Alberta, Faculty of Nursing; Hartling, Lisa A.; University of Alberta, Department of Pediatrics Louie-Poon, Samantha; University of Alberta, Faculty of Nursing Scott, Shannon; University of Alberta, Faculty of Nursing                                                                                                                                                                                                                                                                                                                                                                                                                                                                                                                                                                                                                                                                                                                                                                                                                                                                                                                                                                                                                                                                                                                                                                                                                                                                                                                                                                                                                                                                                                                                                                                                                                      |
| More Detailed Keywords:       | Bronchiolitis, Information Needs, Patient Education                                                                                                                                                                                                                                                                                                                                                                                                                                                                                                                                                                                                                                                                                                                                                                                                                                                                                                                                                                                                                                                                                                                                                                                                                                                                                                                                                                                                                                                                                                                                                                                                                                                                                                                                                                                                                                            |
| Keywords:                     | Pediatrics, Qualitative research, Knowledge translation, Patient Oriented Research                                                                                                                                                                                                                                                                                                                                                                                                                                                                                                                                                                                                                                                                                                                                                                                                                                                                                                                                                                                                                                                                                                                                                                                                                                                                                                                                                                                                                                                                                                                                                                                                                                                                                                                                                                                                             |
| Abstract:                     | <p>Background: Bronchiolitis, an acute lower respiratory tract infection, affects more than one third of children before the age of two. Bronchiolitis has the potential to severely affect a young child's health and cause significant anxiety for parents. The anxiety parents experience often leads them to seek emergency or other medical care to manage their child's illness. While a wide variety of information is available, parents are not always aware of this material, and if they are, the treatment variability for bronchiolitis can leave parents uncertain about what to do. The aim of this qualitative study was to explore parent experiences and information needs caring for a child with bronchiolitis.</p> <p>Methods: This study used a qualitative descriptive approach. Participants were recruited by purposive sampling from the Stollery Children's Hospital emergency department (ED), a specialized pediatric ED in a major Canadian urban center (Edmonton, Alberta). Individual semi-structured interviews were conducted with 15 parents.</p> <p>Results: Three major themes were identified: 1) parent information needs about bronchiolitis, 2) parent preferred information sources, and 3) parent preferred information delivery formats. Findings indicate that parents want and require credible, and easy to understand information about bronchiolitis in a variety of formats, and especially value information directly from a healthcare professional or an evidence-based internet website.</p> <p>Interpretation: This study provides important information about parents' information needs for bronchiolitis in children. Identifying the information parents want and value in relation to acute pediatric illnesses is imperative to developing innovative educational approaches for parents that reflect patient-centered care.</p> |

1  
2  
3  
4  
5  
6  
7  
8  
9  
10  
11  
12  
13  
14  
15  
16  
17  
18  
19  
20  
21  
22  
23  
24  
25  
26  
27  
28  
29  
30  
31  
32  
33  
34  
35  
36  
37  
38  
39  
40  
41  
42  
43  
44  
45  
46  
47  
48  
49  
50  
51  
52  
53  
54  
55  
56  
57  
58  
59  
60

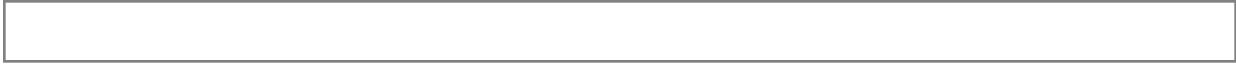

SCHOLARONE™  
Manuscripts

**Manuscript:** Parents information needs and preferences related to bronchiolitis: a qualitative study

## Consolidated criteria for reporting qualitative studies (COREQ): 32-item checklist

Developed from: Tong A, Sainsbury P, Craig J. Consolidated criteria for reporting qualitative research (COREQ): a 32-item checklist for interviews and focus groups. *International Journal for Quality in Health Care*. 2007. Volume 19, Number 6: pp. 349 – 357

| No. Item                                       | Guide questions/description                                                                                                               | Reported on Page #                               |
|------------------------------------------------|-------------------------------------------------------------------------------------------------------------------------------------------|--------------------------------------------------|
| <b>Domain 1: Research team and reflexivity</b> |                                                                                                                                           |                                                  |
| <i>Personal Characteristics</i>                |                                                                                                                                           |                                                  |
| 1. Interviewer/facilitator                     | Which author/s conducted the interview or focus group?                                                                                    | Page 3                                           |
| 2. Credentials                                 | What were the researcher's credentials?<br>E.g. PhD, MD                                                                                   | Title Page                                       |
| 3. Occupation                                  | What was their occupation at the time of the study?                                                                                       | Title Page and page 3                            |
| 4. Gender                                      | Was the researcher male or female?                                                                                                        | All female (as per authors listed on title page) |
| 5. Experience and training                     | What experience or training did the researcher have?                                                                                      | Page 3 (research assistants, registered nurses)  |
| <i>Relationship with participants</i>          |                                                                                                                                           |                                                  |
| 6. Relationship established                    | Was a relationship established prior to study commencement?                                                                               | Page 3                                           |
| 7. Participant knowledge of the interviewer    | What did the participants know about the researcher? e.g. personal goals, reasons for doing the research                                  | Page 3                                           |
| 8. Interviewer characteristics                 | What characteristics were reported about the interviewer/facilitator? e.g. Bias, assumptions, reasons and interests in the research topic | Pages 3-4                                        |

|                                          |                                                                                                                                                          |                                              |
|------------------------------------------|----------------------------------------------------------------------------------------------------------------------------------------------------------|----------------------------------------------|
| <b>Domain 2: study design</b>            |                                                                                                                                                          |                                              |
| <i>Theoretical framework</i>             |                                                                                                                                                          |                                              |
| 9. Methodological orientation and Theory | What methodological orientation was stated to underpin the study? e.g. grounded theory, discourse analysis, ethnography, phenomenology, content analysis | Pages 2-3                                    |
| <i>Participant selection</i>             |                                                                                                                                                          |                                              |
| 10. Sampling                             | How were participants selected? e.g. purposive, convenience, consecutive, snowball                                                                       | Page 3                                       |
| 11. Method of approach                   | How were participants approached? e.g. face-to-face, telephone, mail, email                                                                              | Page 3                                       |
| 12. Sample size                          | How many participants were in the study?                                                                                                                 | Page 3 and Table 1                           |
| 13. Non-participation                    | How many people refused to participate or dropped out? Reasons?                                                                                          | Pages 3-4                                    |
| <i>Setting</i>                           |                                                                                                                                                          |                                              |
| 14. Setting of data collection           | Where was the data collected? e.g. home, clinic, workplace                                                                                               | Page 3                                       |
| 15. Presence of non-participants         | Was anyone else present besides the participants and researchers?                                                                                        | Page 3                                       |
| 16. Description of sample                | What are the important characteristics of the sample? e.g. demographic data, date                                                                        | Page 3 and Table 1                           |
| <i>Data collection</i>                   |                                                                                                                                                          |                                              |
| 17. Interview guide                      | Were questions, prompts, guides provided by the authors? Was it pilot tested?                                                                            | Page 3 and Interview Guide (additional file) |
| 18. Repeat interviews                    | Were repeat interviews carried out? If yes, how many?                                                                                                    | N/A                                          |
| 19. Audio/visual recording               | Did the research use audio or visual recording to collect the data?                                                                                      | Page 3                                       |
| 20. Field notes                          | Were field notes made during and/or after the inter view or focus group?                                                                                 | Pages 3-4                                    |
| 21. Duration                             | What was the duration of the inter views                                                                                                                 | Page 3                                       |

|                                        |                                                                                                                                 |                            |
|----------------------------------------|---------------------------------------------------------------------------------------------------------------------------------|----------------------------|
|                                        | or focus group?                                                                                                                 |                            |
| 22. Data saturation                    | Was data saturation discussed?                                                                                                  | Page 3                     |
| 23. Transcripts returned               | Were transcripts returned to participants for comment and/or correction?                                                        | N/A                        |
| <b>Domain 3: analysis and findings</b> |                                                                                                                                 |                            |
| <i>Data analysis</i>                   |                                                                                                                                 |                            |
| 24. Number of data coders              | How many data coders coded the data?                                                                                            | Pages 3-4                  |
| 25. Description of the coding tree     | Did authors provide a description of the coding tree?                                                                           | Page 3-4 (coding sequence) |
| 26. Derivation of themes               | Were themes identified in advance or derived from the data?                                                                     | Page 3-4                   |
| 27. Software                           | What software, if applicable, was used to manage the data?                                                                      | Page 3                     |
| 28. Participant checking               | Did participants provide feedback on the findings?                                                                              | N/A                        |
| <i>Reporting</i>                       |                                                                                                                                 |                            |
| 29. Quotations presented               | Were participant quotations presented to illustrate the themes/findings? Was each quotation identified? e.g. participant number | Table 2                    |
| 30. Data and findings consistent       | Was there consistency between the data presented and the findings?                                                              | Table 2 and pages 4-7      |
| 31. Clarity of major themes            | Were major themes clearly presented in the findings?                                                                            | Pages 4-7                  |
| 32. Clarity of minor themes            | Is there a description of diverse cases or discussion of minor themes?                                                          | Pages 4-7                  |

1  
2  
3 **Title: Parent information needs and preferences related to pediatric bronchiolitis: a qualitative study.**  
4

5 **Author Names and Affiliations:** Alyson Campbell, RN, BScN<sup>1</sup>, Lisa Hartling, PhD<sup>2</sup>, Samantha Louie-Poon,  
6 RN, BScN<sup>1</sup>, Shannon D Scott, PhD, RN<sup>1</sup>  
7  
8

9 <sup>1</sup>Evidence in Child Health to advance Outcomes (ECHO), Faculty of Nursing, University of Alberta,  
10 Edmonton, Canada  
11

12  
13 <sup>2</sup>Alberta Research Centre for Health Evidence (ARCHE), Department of Pediatrics, Faculty of Medicine  
14 and Dentistry, University of Alberta, Edmonton Canada  
15

16  
17 **Corresponding Author at :** Alyson Campbell, Edmonton Clinic Health Academy 5-147, University of  
18 Alberta, 11405-87 Avenue NW, Edmonton, Alberta, Canada T6G 1C9; email: alc1@ualberta.ca  
19  
20

21  
22  
23  
24  
25  
26  
27  
28  
29  
30  
31  
32  
33  
34  
35  
36  
37  
38  
39  
40  
41  
42  
43  
44  
45  
46  
47  
48  
49  
50  
51  
52  
53  
54  
55  
56  
57  
58  
59  
60

Confidential

## INTRODUCTION

Bronchiolitis, an acute lower respiratory tract infection, affects more than one third of children below age two and is the most common cause for hospital admission in their first year (1). Respiratory syncytial virus (RSV) is the most common cause of bronchiolitis and is characterized by inflammation and edema in the small airways with increased mucous production (2). While most instances of bronchiolitis are self-limiting, the disease can result in severe complications, such as pneumonia and empyema. These complications can severely affect a child's health, and may result in hospitalization (3). While bronchiolitis can clearly have an impact on the physical health of children, studies indicate that parents suffer psychologically and emotionally through their child's illness and need support (4, 5).

Parental anxiety and uncertainty are common during a child's illness, leading them to seek emergency or medical care (6). A wide variety of parental information is available including written and online material. Parents are not always aware of this material, and if they are, the clinical treatment variability for bronchiolitis can leave parents uncertain about who or what sources of information they can trust (3, 6, 7). It is therefore imperative to understand the information needs of parents in relation to bronchiolitis, understand where they look for this information and how they prefer this information be provided. The aim of this qualitative study was to explore parent experiences and information needs caring for a child with bronchiolitis. Here, we report explicitly on the information needs and preferences of parents.

## METHODS

This exploratory study used qualitative descriptive approaches (8). Ethics approval for this study was obtained from the University of Alberta Health Research Ethics Board and institutional approval was obtained from Alberta Health Services prior to participant recruitment.

## Sample

1  
2  
3 Participants were recruited using purposive sampling from the Stollery Children’s Hospital  
4 emergency department (ED), a specialized pediatric ED in a major Canadian urban center. The inclusion  
5 criteria for study participation were 1) caregiver presenting to the Stollery Children’s Hospital ED seeking  
6 care for their child with bronchiolitis symptoms; 2) caregiver is fluent in English; and 3) caregiver agrees  
7 to be contacted by the research team for one-on-one interview. Recruitment team members identified  
8 eligible participants via the ED Information System. Data collection and analysis occurred concurrently  
9 over an 8-month period until data saturation was achieved (9).

### 19 **Data Collection**

21  
22 Caregivers completed demographic information forms after agreeing to participate. The first or  
23 third author (registered nurses and research assistants) conducted 15 semi-structured interviews.  
24 Interviews were conducted in person at a mutually agreed upon date, time and location or by  
25 telephone. All interviews were digitally recorded and transcribed verbatim. Interview questions moved  
26 from general to specific with later interviews becoming more focused (See Interview Guide,  
27 Supplementary Material).

### 36 **Data Analysis**

38  
39 Inductive thematic approaches guided analysis. NVivo 11 was used for data management. First,  
40 transcripts were read in detail several times. Second, the first author conducted open coding of all  
41 transcripts and grouped codes into preliminary categories. Third, preliminary categories across cases  
42 were grouped into a beginning organizational framework according to explicit information needs.  
43 Credibility or trustworthiness of the data was guided by four criteria: 1) credibility, 2) confirmability, 3)  
44 dependability, and 4) transferability. Credibility was addressed by obtaining a broad sample, allowing for  
45 multiple and diverse perspectives and reducing the risk of bias from a particular participant  
46 demographic (i.e. all females, high-income). We addressed confirmability by maintaining a  
47  
48  
49  
50  
51  
52  
53  
54  
55  
56  
57  
58  
59  
60



1  
2  
3 comprehensive audit trail, field notes, memos and interview tapes. Dependability was addressed by  
4 keeping a detailed audit trail documenting all decisions made throughout the research process. Finally,  
5 transferability was addressed through thick descriptions and further enhanced through purposive  
6 sampling techniques. Analytic rigor was enhanced through author discussions in which the coding  
7 framework, analytic procedures, preliminary findings and interpretations were reviewed. Demographic  
8 data were analyzed descriptively.  
9  
10  
11  
12  
13  
14  
15

## 16 17 **RESULTS**

### 18 19 **Demographics**

20  
21  
22  
23 Demographic characteristics of participants are presented in **Table 1**. The mean age of children  
24 was 9 months ( $SD=7.06$ ) and all of these children ( $n=15$ , 100%) experienced bronchiolitis for the first  
25 time. We explored three major recurrent themes: 1) parents' information needs about childhood  
26 bronchiolitis, 2) parents' preferred sources to seek health information about their child and 3) parents'  
27 preferred formats to receive health information regarding their child. Each of these themes contains a  
28 number of subthemes. Participant quotations supporting each theme are displayed in **Table 2**.  
29  
30  
31  
32  
33  
34  
35  
36

#### 37 **Theme 1: Parents' information needs about childhood bronchiolitis**

##### 38 39 ***Subtheme 1: Recognizing Severity***

40  
41  
42  
43 Parents had difficulty interpreting the meaning and severity of bronchiolitis symptoms. All  
44 children in our study were experiencing bronchiolitis for the first time, and parents commonly reported  
45 feeling unprepared and not knowing what to expect. Recognizing symptoms, symptom severity, and  
46 when to go to the ED were interpreted as fundamental information needs, and without this knowledge,  
47 parents' abilities to manage their child's illness and seek timely medical care was hindered. Recognizing  
48 symptoms and determining when to seek emergency care improved with experience for some, but not  
49  
50  
51  
52  
53  
54  
55  
56  
57  
58  
59  
60

1  
2  
3 all, parents (i.e. experience of bronchiolitis with a different child). Overall, first time experiences often  
4  
5 resulted in the child's symptoms exacerbating and not receiving timely medical attention. Seven children  
6  
7 were admitted to hospital for 24 hours or more, including two children who were admitted to the  
8  
9 pediatric intensive care unit. Eleven children required oxygen. Six parents reported the number one  
10  
11 thing they would have done differently to help their child was not to wait as long before seeking  
12  
13 emergency care.  
14  
15

### 16 17 ***Subtheme 2: Knowing "About" Bronchiolitis*** 18

19  
20 Parents identified wanting to know more about what causes bronchiolitis, what the treatments  
21  
22 are, and if or how bronchiolitis can be prevented. Most parents reported receiving little to no  
23  
24 information about bronchiolitis from their health care providers (HCPs) from the time of diagnosis to the  
25  
26 time of discharge. Many parents disclosed looking for information online, but preferred to learn this  
27  
28 information from a HCP.  
29  
30

## 31 32 **Theme 2: Parents' preferred sources to seek health information about their child** 33

### 34 35 ***Subtheme 1: Talking to a Health Care Professional*** 36

37  
38 Parents commonly reported turning to a HCP, typically their pediatrician, when their child  
39  
40 became ill. Parents reported calling their pediatrician first, to seek professional opinion, before going to  
41  
42 the ED. Some parents reported going to the ED was a decision made by their pediatrician. Parents  
43  
44 trusted their pediatrician and receiving information from the pediatrician often relieved parents'  
45  
46 anxiety. However, few parents reported actually receiving an adequate explanation of bronchiolitis.  
47  
48 When asked what information they received from HCP's about bronchiolitis common responses were  
49  
50 "not much" and "yeah, nothing". In the province of Alberta, Alberta Health Services (AHS) Health Link  
51  
52 provides a 24/7 telephone nurse advice and general health information service. Parents reported  
53  
54 phoning AHS Health Link when they were uncertain if their child needed to be seen by a physician (n=6).  
55  
56  
57  
58  
59  
60

### ***Subtheme 2: Internet***

In addition to seeking information from HCPs, many parents (n=12) turned to the Internet to learn about bronchiolitis. Parents commonly used Internet search engines (i.e., Google) to look up their child's symptoms (e.g. runny nose, fever, cough) before going to the ED, as many did not know to specifically search for "bronchiolitis". Upon discharge, parents searched "bronchiolitis" to find out additional information such as signs and symptoms, treatments, and prevention. When asked how parents determined what Internet sources they could trust, they distinguished between "clinical" versus "opinion" websites. Parents felt they could trust "clinically based" (i.e., WebMD) more than "opinion" (i.e., social media, blogs) websites. Most parents reported against using social media to seek health information. Parents preferred Internet sources that provided information in "layman's terms" and were Canadian-based.

## **Theme 3: Parents' preferred formats to receive health information regarding their child**

### ***Subtheme 1: Written Information***

Parents preferred receiving information about bronchiolitis in written forms, such as pamphlets or information sheets (n=6). Parents indicated that a pamphlet with information outlining what bronchiolitis is, common symptoms, and when to go to the ED would be useful. Parents reported receiving these pamphlets before their child becomes sick would be beneficial, such as in their pediatrician's office during regular check-ups, vaccination clinics or as part of a newborn discharge package. Parents indicated knowing about bronchiolitis before it happens would better prepare them for the experience.

### ***Subtheme 2: Online sources***

1  
2  
3 Despite parents indicating the Internet can have untrustworthy information sources, many still  
4 chose to look up information online. Parents most commonly looked to medical websites that provided  
5 information in a simple way that they could scroll through and read. When asked about videos as a way  
6 to deliver information, some parents indicated they would not be inclined to watch, while others felt  
7 videos could be useful to learn about things like proper techniques for suctioning with bulb suction.  
8  
9  
10  
11  
12  
13

### 14 ***Subtheme 3: Verbal Communication***

15  
16 Overall, parents preferred to receive information in person, especially if coming directly from a  
17 HCP. Parents described how talking to friends and family often helped them through their experience  
18 with their child's illness. Receiving face-to-face confirmations and reassurances about their child's illness  
19 and treatment plan relieved anxiety.  
20  
21  
22  
23  
24  
25  
26

## 27 **INTERPRETATION**

28  
29  
30 Bronchiolitis is common in young children and causes substantial parental concern. Our study  
31 provides a comprehensive perspective on caregivers' information needs related to their child's  
32 bronchiolitis, reinforcing and adding to existing literature on childhood bronchiolitis. Our findings build  
33 upon a mixed-methods systematic review conducted by our research team on the experiences and  
34 information needs of parents related to bronchiolitis. This systematic review found that parents need  
35 information about bronchiolitis, but limited research is available to inform the type, timing, and source  
36 of information parents would find most useful (10). Findings from this study address these limitations.  
37  
38 We have organized our discussion by our key study findings 1) parents' information needs about  
39 childhood bronchiolitis, 2) parents' preferred sources to seek health information about their child and 3)  
40 parents' preferred formats to receive health information regarding their child.  
41  
42  
43  
44  
45  
46  
47  
48  
49  
50  
51  
52

### 53 ***Parents' Information Needs about Childhood Bronchiolitis***

1  
2  
3 Parents' information deficits were evident in their comments (i.e., what causes bronchiolitis?  
4 How can I prevent my children from getting bronchiolitis?) and the self-reported frequency of ED visits.  
5  
6 All 15 parents reported taking their child to the ED 1-5 times. Parents felt they received insufficient  
7  
8 information on how to recognize symptom severity, especially experiencing bronchiolitis with their child  
9  
10 for the first time. Parents often overlooked symptoms of bronchiolitis such as rapid breathing and in-  
11  
12 drawing until an emergency occurred. Our mixed-methods review found that parents often have  
13  
14 difficulty assessing the seriousness of respiratory tract infections (10). Similarly, in previous qualitative  
15  
16 work by Peeler et al (11) parents found they could tell their child was sick, but could not always identify  
17  
18 signs specific to bronchiolitis. Yael et al (12) reported parents sometimes felt unaware of what  
19  
20 symptoms might warrant further medical care. Inaccurately estimating the severity of bronchiolitis may  
21  
22 lead to missed opportunities for timely treatment, resulting in a significant threat to a child's well-being.  
23  
24 In our study, 7 of 15 children were admitted to hospital for at least 24 hours, with two of these children  
25  
26 requiring intensive care.  
27  
28  
29  
30  
31

32  
33 Parents in our study suggested receiving educational information about bronchiolitis before  
34  
35 their child got sick might have been helpful. This is congruent with findings from Neill et al (13)  
36  
37 suggesting that educational material assessing illness severity may be effective in supporting parents to  
38  
39 care for their children and only seek help when necessary. Working with parents to promote an  
40  
41 understanding on how to accurately interpret bronchiolitis symptoms may promote parent confidence  
42  
43 while reducing anxiety and unnecessary ED visits.  
44  
45  
46

#### 47 ***Parents' Preferred Sources to Seek Health Information about their Child***

48  
49

50 Our findings identified parents prefer to receive information from a trusted HCP when they have  
51  
52 a sick child. Trusted HCPs included their pediatrician, family physician or nurses. This finding is  
53  
54 congruent with other research that has examined where parents prefer to look for health information  
55  
56  
57  
58  
59  
60

1  
2  
3 for pediatric conditions such as RSV, otitis media and gastroenteritis (14-17). Further, as Jones et al (18)  
4 highlighted, for worried parents nothing will replace face-to-face reassurance from a HCP. Although  
5 parents in our study value and prefer to receive information from a HCP, few parents reported receiving  
6 adequate explanations on the nature of bronchiolitis, treatment options or illness trajectory. This finding  
7 is consistent with other qualitative studies reporting that mothers described not being informed about  
8 how their child's illness would progress and what the prognosis would be (11). Similarly, Cabral et al (19)  
9 found that parents can find it difficult to understand acute illnesses in their child and feel disempowered  
10 by inadequate information sharing by doctors. Our study, and others, (11, 18, 19) suggest missed  
11 opportunities occur to inform parents about the appropriate care and management of respiratory tract  
12 infections.  
13  
14  
15  
16  
17  
18  
19  
20  
21  
22  
23  
24  
25

26 Parents from our study indicated that receiving timely information verbally, written or from an  
27 online credible website would be helpful and preferred. This is consistent with research indicating the  
28 receipt of timely information about a child's illness can help alleviate parental fears and help establish  
29 trusting relationships with HCPs (11). It is therefore critical to develop appropriate and accessible  
30 information to share with parents.  
31  
32  
33  
34  
35  
36  
37

### 38 ***Parents' Preferred Formats to Receive Health Information about Their Child***

39  
40

41 Although parents may seek information from a variety of sources to learn about their child's  
42 bronchiolitis, these may not always be reputable (3). Parents in our study reported turning to the  
43 Internet for treatments and symptoms of bronchiolitis, despite recognizing Internet sources cannot  
44 always be trusted. Parental need for high-quality Internet-based resources is not surprising given the  
45 evidence that parents are increasingly using the Internet to access health information. A survey of 360  
46 parents found 52% sought health information for their children on the Internet (20, 21). Providing  
47  
48  
49  
50  
51  
52  
53  
54  
55  
56  
57  
58  
59  
60

1  
2  
3 parents with accessible information online that is credible, is essential to ensuring they are making well-  
4 informed decisions about their child's health.  
5  
6  
7

8 Limitations of this study include interviews conducted at a single point in time and only with parents  
9 who were seeking care in the ED. Recall bias may be present as we relied on parent self-report of their  
10 information needs. Caution should be used when generalizing the results of this study to other regions,  
11 populations, and child health conditions. Participants reported high levels of income and education and  
12 were recruited in the ED of a tertiary care facility in an urban area in a developed country; thus, findings  
13 cannot be extrapolated to caregivers that manage bronchiolitis at home without seeking emergency  
14 care, or caregivers in other types of care centers or geographic regions.  
15  
16  
17  
18  
19  
20  
21  
22  
23

## 24 **Conclusions**

25  
26  
27 These findings are valuable and necessary to develop information resources about bronchiolitis  
28 that parents will find useful and relevant. Involving parents in the development of information resources  
29 about acute pediatric illnesses, like bronchiolitis, supports the general trend towards involving patients  
30 in research, emphasizing the importance of working collaboratively with end-users of interventions (13).  
31  
32  
33  
34  
35  
36

37 It is recognized that one approach to deliver information to parents about childhood  
38 bronchiolitis will not be appropriate for everyone and a variety of techniques and resources are  
39 required. However, the results of our study reveal that generally parents prefer to seek health  
40 information directly from a HCP, or online. Parents value information that is easy to understand and  
41 considered credible.  
42  
43  
44  
45  
46  
47  
48  
49  
50  
51  
52  
53  
54  
55  
56  
57  
58  
59  
60

## REFERENCES

1. Friedman JN, Rieder MJ, Walton JM. Bronchiolitis: Recommendations for diagnosis, monitoring and management of children one to 24 months of age. *Paediatrics & Child Health* (1205-7088). 2014;19(9):485-91.
2. Nicolai A, Ferrara M, Schiavariello C, Gentile F, Grande ME, Alessandroni C, et al. Viral bronchiolitis in children: A common condition with few therapeutic options. *Early Human Development*. 2013;89(Supplement 3):S7-S11.
3. Ingram J, Cabral C, Hay AD, Lucas PJ, Horwood J. Parents' information needs, self-efficacy and influences on consulting for childhood respiratory tract infections: a qualitative study. *BMC Family Practice*. 2013;14(1):106-14.
4. Kamban SW, Svavarsdottir EK. Does a therapeutic conversation intervention in an acute paediatric setting make a difference for families of children with bronchiolitis caused by respiratory syncytial virus ( RSV)? *Journal of Clinical Nursing*. 2013;22(19-20):2723-33.
5. Leidy NK, Margolis MK, Marcin JP, Flynn JA, Frankel LR, Johnson S, et al. The Impact of Severe Respiratory Syncytial Virus on the Child, Caregiver, and Family During Hospitalization and Recovery. *Pediatrics*. 2005;115(6):1536.
6. Neill S. Acute childhood illness at home: the parents' perspective. *Journal of Advanced Nursing*. 2000(4):821.
7. Jackson C, Cheater FM, Reid I. A systematic review of decision support needs of parents making child health decisions. *Health Expectations*. 2008;11(3):232-51.
8. Sandelowski M. Focus on research methods: Whatever happened to qualitative description ? *Research in nursing & health*. 2000(4):334.
9. Sandelowski M. Sample size in qualitative research. *Research in nursing & health*. 1995(2):179.
10. Gates M, Shulhan-Kilroy J, Featherstone R, MacGregor T, Scott SD, Hartling L. Review article: Parent experiences and information needs related to bronchiolitis: A mixed studies systematic review. *Patient Education and Counseling*. 2018.
11. Peeler A, Fulbrook P, Kildea S. The experiences of parents and nurses of hospitalised infants requiring oxygen therapy for severe bronchiolitis: A phenomenological study. *Journal of Child Health Care*. 2015;19(2):216-28.
12. Yael Kopacz N, Predeger E, Kelley C. Experiences of Alaskan Parents With Children Hospitalized for Respiratory Syncytial Virus Treatment. *Journal of Pediatric Nursing*. 2013(6):e19.
13. Neill S, Roland D, Jones CHD, Thompson M, Lakhanpaul M. Information resources to aid parental decision-making on when to seek medical care for their acutely sick child: a narrative systematic review. *BMJ Open*. 2015;5(12):e008280.
14. Pignotti MS, Catarzi S, Donzelli G. A 4-year survey on palivizumab respiratory syncytial virus (RSV)-prophylaxis: How can compliance be improved? 2006. p. 221-4.
15. Xu J. What factors influence parent compliance with the Respiratory Syncytial Virus (RSV) prevention program? : University of Calgary, Community Health Sciences, Medicine, 2006.; 2006.
16. Meherali S, Campbell A, Hartling L, Scott S. Understanding Parents' Experiences and Information Needs on Pediatric Acute Otitis Media: A Qualitative Study. *Journal of Patient Experience*. 2018:2374373518771362.
17. Albrecht L, Hartling L, Scott SD. Pediatric acute gastroenteritis: understanding caregivers' experiences and information needs. *CJEM*. 2016;19(3):198-206.
18. Jones CHD, Neill S, Lakhanpaul M, Roland D, Singlehurst-Mooney H, Thompson M. Information needs of parents for acute childhood illness: determining 'what, how, where and when' of safety netting using a qualitative exploration with parents and clinicians. *BMJ Open*. 2014;4(1):e003874.



- 1
  - 2
  - 3
  - 4
  - 5
  - 6
  - 7
  - 8
  - 9
  - 10
  - 11
  - 12
  - 13
  - 14
  - 15
  - 16
  - 17
  - 18
  - 19
  - 20
  - 21
  - 22
  - 23
  - 24
  - 25
  - 26
  - 27
  - 28
  - 29
  - 30
  - 31
  - 32
  - 33
  - 34
  - 35
  - 36
  - 37
  - 38
  - 39
  - 40
  - 41
  - 42
  - 43
  - 44
  - 45
  - 46
  - 47
  - 48
  - 49
  - 50
  - 51
  - 52
  - 53
  - 54
  - 55
  - 56
  - 57
  - 58
  - 59
  - 60
19. Cabral C, Ingram J, Hay AD, Horwood J. Patient Perception, Preference and Participation: “They just say everything's a virus”—Parent's judgment of the credibility of clinician communication in primary care consultations for respiratory tract infections in children: A qualitative study. *Patient Education and Counseling*. 2014;95:248-53.
20. Khoo K, Bolt P, Babl FE, Jury S, Goldman RD. Health information seeking by parents in the Internet age. *Journal of Paediatrics & Child Health*. 2008;44(7/8):419-23.
21. Ferreccio C, Corvalán A, Margozzini P, Viviani P, González C, Aguilera X, et al. Parental use of the Internet to seek health information and primary care utilisation for their child: a cross-sectional study. *BMC Public Health*. 2008;8(1):300-8.

Confidential

| <b>Table 1. Demographic Characteristics of Sample of Parents of Children with Bronchiolitis</b> |          |          |
|-------------------------------------------------------------------------------------------------|----------|----------|
| <b>Variable</b>                                                                                 | <b>N</b> | <b>%</b> |
| <b>Gender</b>                                                                                   |          |          |
| • Male                                                                                          | 3        | 20       |
| • Female                                                                                        | 12       | 80       |
| <b>Parents Age</b>                                                                              |          |          |
| • Less than 20 years                                                                            | 1        | 6.7      |
| • 20-30 years                                                                                   | 1        | 6.7      |
| • 31-40 years                                                                                   | 12       | 80       |
| • 41-50 years                                                                                   | 1        | 6.7      |
| <b>Marital Status</b>                                                                           |          |          |
| • Married/Partnered                                                                             | 13       | 86.7     |
| • Single                                                                                        | 2        | 13.3     |
| <b>Household Income</b>                                                                         |          |          |
| • Less than \$25 000                                                                            | 1        | 6.7      |
| • \$25 000-\$49 999                                                                             | 1        | 6.7      |
| • \$50 000-\$74 999                                                                             | 3        | 20       |
| • \$75 000-\$99 999                                                                             | 1        | 6.7      |
| • \$100 000-\$149 999                                                                           | 4        | 26.7     |
| • \$150 000 and over                                                                            | 3        | 20       |
| • Prefer not to answer                                                                          | 2        | 13.3     |
| <b>Highest Level of Education</b>                                                               |          |          |
| • High school diploma                                                                           | 2        | 13.3     |
| • Some post-secondary                                                                           | 2        | 13.3     |
| • Post-secondary certificate/diploma                                                            | 3        | 20       |
| • Post-secondary degree                                                                         | 4        | 26.7     |
| • Graduate degree                                                                               | 3        | 20       |
| • Other                                                                                         | 1        | 6.7      |
| <b>Number of Children at Home</b>                                                               |          |          |
| • 1                                                                                             | 4        | 26.7     |
| • 2                                                                                             | 7        | 46.7     |
| • 3                                                                                             | 3        | 20       |
| • 4                                                                                             | 1        | 6.7      |
| <b>Age of Child Brought to ED</b>                                                               |          |          |
| • Less than 1 year old                                                                          | 9        | 60       |
| • 1-2 years old                                                                                 | 6        | 40       |
| <b>Frequency of Bronchiolitis</b>                                                               |          |          |
| • First episode                                                                                 | 15       | 100      |

**Table 2:** Participant quotes to support thematic analysis

| Thematic analysis                                                                                                       | Participant quotes                                                                                                                                                                                                                                                                                                                                                                                                                                                                                                                                                                                                                                                                                                                                                                                                                                                                                                                                                                                                                                                                                                                                                                                                                                                                                                                         |
|-------------------------------------------------------------------------------------------------------------------------|--------------------------------------------------------------------------------------------------------------------------------------------------------------------------------------------------------------------------------------------------------------------------------------------------------------------------------------------------------------------------------------------------------------------------------------------------------------------------------------------------------------------------------------------------------------------------------------------------------------------------------------------------------------------------------------------------------------------------------------------------------------------------------------------------------------------------------------------------------------------------------------------------------------------------------------------------------------------------------------------------------------------------------------------------------------------------------------------------------------------------------------------------------------------------------------------------------------------------------------------------------------------------------------------------------------------------------------------|
| <p>Theme 1: Parents' information needs about childhood bronchiolitis</p> <p><i>Subtheme 1: Recognizing Severity</i></p> | <p><i>"I didn't really know that a virus could make my daughter have that much trouble breathing"</i> (Interview 3, child age 1 year)</p> <p><i>"like, I always knew they were gonna get sick, but I always thought it would be like a one or two day thing"</i> (Interview 5, child age 6.5 months)</p> <p><i>"it was a little difficult to get at which point he actually has to go to Emergency"</i> (Interview 10, child age 6 weeks)</p> <p><i>"for a parent who doesn't have a medical background, it is very hard to understand that point, where you have to go right away to Emerg"</i> (Interview 11, child age 7 months)</p> <p><i>"I think we—we waited longer [to go to the ED] because we thought maybe it was something to recover from quickly"</i> (Interview 5, child age 6.5 months)</p> <p><i>"Well, he's our third child, so we've got two kids before, right? So normally—when the kids get sick, we give them Tylenol, something like that, but when we notice they start to get difficulty breathing, then we know we gotta go to the doctor"</i> (Interview 6, child age 19 months)</p> <p><i>"It's not like, "Oh yeah, I've done this before...it's like oh my god, what do I do again? Like this is happening again? What did I do the first time? I don't remember"</i> (Interview 1, child age 11 months)</p> |
| <p><i>Subtheme 2: Knowing "About" Bronchiolitis</i></p>                                                                 | <p><i>"I didn't know a whole lot about it [bronchiolitis]"</i> (Interview 9, child age 2 years)</p> <p><i>"I was asking that, how it has been caused? And...why-what is the source of these symptoms?"</i> (Interview 1, child age 11 months)</p> <p><i>"they [healthcare team] didn't really explain like how-or what kind of symptoms I should be looking for"</i> (Interview 1, child age 11 months)</p>                                                                                                                                                                                                                                                                                                                                                                                                                                                                                                                                                                                                                                                                                                                                                                                                                                                                                                                                |

|                                                                                                                                                       |                                                                                                                                                                                                                                                                                                                                                                                                                                                                                                                                                                                                                                                                                                                                                                                                                                                                                                                                                                                                                                                                                                                                                                                                                                                                                                                                                                                                                                                                         |
|-------------------------------------------------------------------------------------------------------------------------------------------------------|-------------------------------------------------------------------------------------------------------------------------------------------------------------------------------------------------------------------------------------------------------------------------------------------------------------------------------------------------------------------------------------------------------------------------------------------------------------------------------------------------------------------------------------------------------------------------------------------------------------------------------------------------------------------------------------------------------------------------------------------------------------------------------------------------------------------------------------------------------------------------------------------------------------------------------------------------------------------------------------------------------------------------------------------------------------------------------------------------------------------------------------------------------------------------------------------------------------------------------------------------------------------------------------------------------------------------------------------------------------------------------------------------------------------------------------------------------------------------|
|                                                                                                                                                       | <p><i>“To be honest, like I had Googled it a bit. So, I knew to look for in drawing and stuff. Nobody had really told me that” (Interview 13, child age 7 months).</i></p>                                                                                                                                                                                                                                                                                                                                                                                                                                                                                                                                                                                                                                                                                                                                                                                                                                                                                                                                                                                                                                                                                                                                                                                                                                                                                              |
| <p>Theme 2: Parents’ preferred sources to seek health information about their child<br/> <i>Subtheme 1: Talking to a Health Care Professional</i></p> | <p><i>“I’ll just call the pediatrician and just take an appointment...at some point, it’s just saying well, I’m gunna try to rely on somebody who’s more knowledgeable than me for this specific problem” (Interview 3, child age 14 months).</i></p> <p><i>“So, I called the doctor – we had gone already a couple of times to the doctor. But I called and I just said that he wasn’t getting better, and I asked if I should bring him back in. This was about five days after – or six days after he originally got sick. And then, when we went into our pediatrician’s office, he rushed us for a chest x-ray and some blood work, and then back to his clinic and by the time we had got back to his clinic, he had read the chest x-ray report. He then contacted EMS to take us to the Stollery” (Interview 4, child age 16 months)</i></p> <p><i>“As much as we wanted to go home, it was really good that he [pediatrician] had him admitted. Because you know, that kind of really alleviated any fears that were left in me, because I knew, you know, he was being looked after by medical professionals”. (Interview 1, child age 11 months)</i></p> <p><i>“So I was calling Health Link, just-you know cause it’s always...it’s totally helpful to talk to somebody” (Interview 11, child age 7 months)</i></p> <p><i>“Normally when they get sick, we call the Health Link line. That—it’s our number one” (Interview 6, child age 19 months).</i></p> |
| <p><i>Subtheme 2: Internet</i></p>                                                                                                                    | <p><i>“Google is like a mom’s...best friend,” (Interview 1, child age 11 months)</i></p> <p><i>“yeah, I Googled like...worsening coughs, and like fever lasting longer than three days” (Interview 2, child age 3 months)</i></p> <p><i>“If I see like symptoms that seems to me, strange, other than being a normal cold, then, yes. I check online” (Interview 14, child age 1 year)</i></p>                                                                                                                                                                                                                                                                                                                                                                                                                                                                                                                                                                                                                                                                                                                                                                                                                                                                                                                                                                                                                                                                          |

|                                                                                                                                    |                                                                                                                                                                                                                                                                                                                                                                                                                                                                                                                                                                                                                                                                                                                                                                                                                                                            |
|------------------------------------------------------------------------------------------------------------------------------------|------------------------------------------------------------------------------------------------------------------------------------------------------------------------------------------------------------------------------------------------------------------------------------------------------------------------------------------------------------------------------------------------------------------------------------------------------------------------------------------------------------------------------------------------------------------------------------------------------------------------------------------------------------------------------------------------------------------------------------------------------------------------------------------------------------------------------------------------------------|
|                                                                                                                                    | <p><i>“Like I’ll look at like the Mayo Clinic, or...ones that I know are actually from the health care field and not just somebody’s experience,”</i> said one parent (Interview 12, child age 5 months).</p> <p><i>“You know, like a clinical, kind of, status or whatever. The website—like Web MD is a good site—for me anyway”</i> (Interview 1, child age 11 months).</p> <p><i>“I am a part of...well, the parent groups [on social media] but I don’t ask for...health information through those”</i> (Interview 13, child age 2 months)</p> <p><i>“There’s some [websites] that are meant for...for parents to just kinda, you know, summarize...in layman’s terms, pretty much. You know, symptoms to look for, and what you need to do, when you need to bring the baby to the hospital or anything”</i> (Interview 1, child age 11 months).</p> |
| <p>Theme 3: Parents’ preferred formats to receive health information regarding their child<br/>Subtheme 1: Written Information</p> | <p><i>“I think like-if there would be a pamphlet that describes the...sickness...not in a very scientific, but simple way...that how it happens, and what are the causes and what parents can do about that, or what are the way that we can protect the children more about this type of virus. (Interview 14, child age 1 year).</i></p> <p><i>“I think pamphlets are good. Maybe if parents bring their kids in for flu shots, that can be kind of...given to them. Like a pamphlet about bronchiolitis ‘cause I didn’t know about about it until it happened to my kids.”</i> (Interview 1, child age 11 months)</p> <p><i>“Because bronchiolitis is so hard on newborns, um...part of the discharge package, when you’re leaving um, the hospital from having the babies might not be a bad idea.”</i> (Interview 8, child age 10 weeks).</p>         |
| <p>Subtheme 2: Online sources</p>                                                                                                  | <p><i>“Well, there’s the...Canadian Pediatric Society. There’s like Health Kids. I guess that knowing that these websites-that you can trust, exists. (Interview 3, child age 14 months)</i></p>                                                                                                                                                                                                                                                                                                                                                                                                                                                                                                                                                                                                                                                           |

1  
2  
3  
4  
5  
6  
7  
8  
9  
10  
11  
12  
13  
14  
15  
16  
17  
18  
19  
20  
21  
22  
23  
24  
25  
26  
27  
28  
29  
30  
31  
32  
33  
34  
35  
36  
37  
38  
39  
40  
41  
42  
43  
44  
45  
46  
47  
48  
49  
50  
51  
52  
53  
54  
55  
56  
57  
58  
59  
60

|                                                |                                                                                                                                                                                                                                                                                                                                                                                                                                                                  |
|------------------------------------------------|------------------------------------------------------------------------------------------------------------------------------------------------------------------------------------------------------------------------------------------------------------------------------------------------------------------------------------------------------------------------------------------------------------------------------------------------------------------|
|                                                | <p><i>“Other people don’t like reading, so watching videos, I think that works...but sometimes people need to see words written, or sometimes-like in Canada, we have language barriers. So I feel with information in the video-is too fast. (Interview 15, child age 6 weeks)</i></p> <p><i>“...social media or something, it’s something I would probably ignore-wouldn’t notice.” (Interview 10, child age 2 years).</i></p>                                 |
| <p><i>Subtheme 3: Verbal Communication</i></p> | <p><i>“I think...the best way [to deliver information] is person to person. To be honest.” (Interview 15, child age 6 weeks)</i></p> <p><i>“For me, it’s been having a good pediatrician-like, someone I know that I can call.” (Interview 2, child age 3 months).</i></p> <p><i>“I do have a lot of nursing friends. And so, I text them and...they-like they’re moms as well. So they-they have pretty good input. (Interview 1, child age 11 months.)</i></p> |

## Appendix A

### Interview Guide

#### Bronchiolitis

Parents will be interviewed to understand their experience having a child with bronchiolitis. Semi-structured interviews will be conducted with parents in order to get their “narrative” or experiences. The following questions will be used to guide these interviews. Being true to semi-structured interview techniques, interview questions will start broad and then move to the more specific.

1. Tell me about your experience having your child experience bronchiolitis.
  - a. What were the symptoms? How was your child behaving? How did you know they were sick? Has this happened before?
  - b. When did you decide to take them to the emergency department (ED)? Why did you decide to go to the ED?
  - c. Did your child’s illness affect your day to day activities? Were you getting the usual amount of sleep? How did it affect your family? (partner other kids)
2. Tell me about your child that was ill.
  - a. How old is your child? How was your child ill? How were they feeling? Describe this to me. Were they ‘out of sorts’? Were they eating and sleeping as they normally would? Did they miss their usual activities?
  - b. Has your child previously had bronchiolitis? If so, how many times? How was this time different? Was it different? What time of year?
3. Can you tell me about any thoughts or feelings you were experiencing during this time?
  - a. Were you worried, scared, nervous? Was it stressful? If so, how was it stressful?
4. Tell me how prepared you felt during the experience.
  - a. Did you feel confident in what to do to care for your child? Were you confident that you made the right choice to go to the ED? Did you go to your doctor or call the doctor before going to the ED? Did you call or talk to anyone else to seek advice, such as a friend? Family member? Other health care professional?
5. Did you have all of the information you needed to make decisions about when to seek healthcare? Tell me more about that.
  - a. Did you look for information when your child first became ill? Did you look for information about whether or not to go to the ED or see a doctor?
  - b. Where did you find information? What did you find? Did you find anything that was helpful? If so what was it and where did it come from?
  - c. Where would you typically look for health information for your child? Have you found information in the past? If so, what type of information was it and was it helpful? What do you think would makes information useful?

- 1  
2  
3 6. Do you use social media?
  - 4  
5 a. If so, did you look for information or ask questions on social media? Would you use social media  
6 as a place to get or ask for health information for your child? Which social media platforms do you  
7 use (Facebook, Instagram, snapchat, other).  
8
- 9 7. What did you do to manage symptoms of bronchiolitis? (any techniques you used, for example, giving  
10 Tylenol, talking with family/friends, etc.)
  - 11 a. How did you feel about your treatment regime? Did you feel confident in what you did? How did  
12 your child respond to this?  
13
- 14 8. How was your experience in the ED? Tell me about it.
  - 15 a. Did you have to wait very long? Approximately how long? How were you feeling during your  
16 wait? How was your child feeling? Did you find things for your child to do while waiting? Tell me  
17 about your interactions with the healthcare team. Was it an overall positive experience? If so, what  
18 made the experience positive? If not, what made the experience negative?  
19
- 20 9. Tell me about when or how your child was diagnosed with bronchiolitis – were any tests done? Any  
21 medications ordered?
  - 22 a. What tests were done? Were these tests explained to you and why they were necessary? Were you  
23 uncomfortable with any of the tests that were done (blood work, xrays, other)? If so, what made  
24 you uncomfortable about them? How was your child during these tests - were they nervous,  
25 anxious, crying, etc? Do you feel you got all the information you needed about what was  
26 happening?  
27
- 28 10. What strategies were put in place by health care professionals to help your child? (for example,  
29 giving/prescribing medication). Did they ask you to do anything? If so, how comfortable were you with  
30 that? Did they ask you what you have already tried?
  - 31 a. Did they give you any information before you went home from the ED? If yes, what did they give  
32 you? Did they give you any advice for what to do at home? When to see your doctor? or when to  
33 come back to the ED?  
34
- 35 11. How did your child manage the experience? How did you feel about the outcome of this situation? Did it  
36 go as expected for you?
  - 37 a. Was your child anxious, nervous? Did everything go as you had hoped or planned? Did you have  
38 any follow up – other tests, going back to the doctor?  
39
- 40 12. If presented with the same situation again (your child being ill with bronchiolitis), would you do anything  
41 differently? If so, please tell me.
  - 42 a. How would you make a decision about whether or not to go to the ED? Would you look for  
43 information before going this time? Where would you look or who would you ask for advice?  
44
- 45 13. If the health system were to have information for parents, what do you think would be the best way to get it  
46 to parents? Through their website, call line, advertisements, social media, public health clinics, doctors'  
47 offices, etc.?  
48  
49  
50  
51  
52  
53  
54  
55  
56  
57  
58  
59  
60
